# Supplementary material for: MiR-183/-96/-182 cluster is up-regulated in most breast cancers and increases cell proliferation and migration
Source: PubMed Central journal article supplement (PMC4303194; doi:10.1186/s13058-014-0473-z), 2014-11-14
Supplement: 13058_2014_473_MOESM2_ESM.pdf [file 13058_2014_473_MOESM2_ESM.pdf]

**A**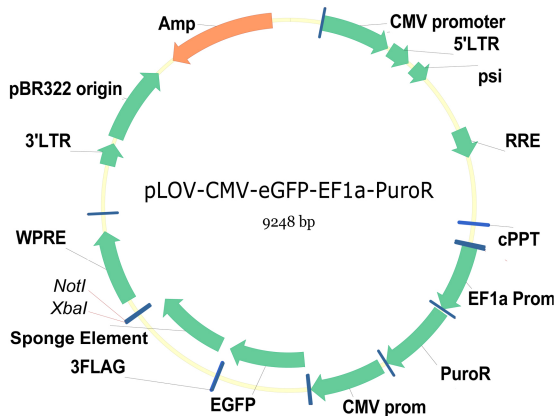**B**

Sponge Element

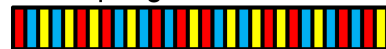

miR-183 binding sequence:

TCG

UTR 5' -AGTGAATTCT AGTGCCATA  
miR UCACUUAAGA UCACGGUAU-5'

UGG

miR-96 binding sequence:

ACG

UTR 5' -AGCAAAAATG AGTGCCAAA  
miR UCGUUUUUAC UCACGGUUU-5'

ACGA

miR-182 binding sequence:

GAGG

UTR 5' -AGTGTGAGTT ATTGCCAAA  
miR UCACACUCA UAACGGUUU-5'

GAUGG

**Figure S2 Creation of miR-183/96/182 cluster sponge lentivirus. (A)** Schematic representation of the pLOV-CMV-eGFP-EF1a-PuroR lentivirus. **(B)** Upper panel shows the schematic representation of the sponge element: 10 copies of binding sites for each miR-183/96/182 cluster miRNA were inserted into the 3'-UTR of EGFP. The construct was under control of CMV promoter. Binding sequences of miR-183, miR-96 and miR-182 are shown in the lower panel.
