# Supplementary material for: MiR-183/-96/-182 cluster is up-regulated in most breast cancers and increases cell proliferation and migration
Source: PubMed Central journal article supplement (PMC4303194; doi:10.1186/s13058-014-0473-z), 2014-11-14

Antisense DNA

miR-96

miR-182  
(human)

miR-183

miR-182  
(mouse)

miR-96

miR-182  
(human)

miR-183

miR-182  
(mouse)

Probes

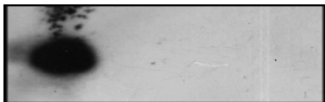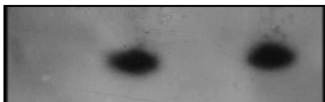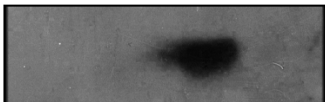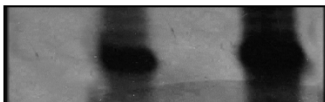

Supplement: 13058_2014_473_MOESM3_ESM.pdf [file 13058_2014_473_MOESM3_ESM.pdf]
