# Supplementary material for: MiR-183/-96/-182 cluster is up-regulated in most breast cancers and increases cell proliferation and migration
Source: PubMed Central journal article supplement (PMC4303194; doi:10.1186/s13058-014-0473-z), 2014-11-14
Supplement: 13058_2014_473_MOESM8_ESM.pdf [file 13058_2014_473_MOESM8_ESM.pdf]

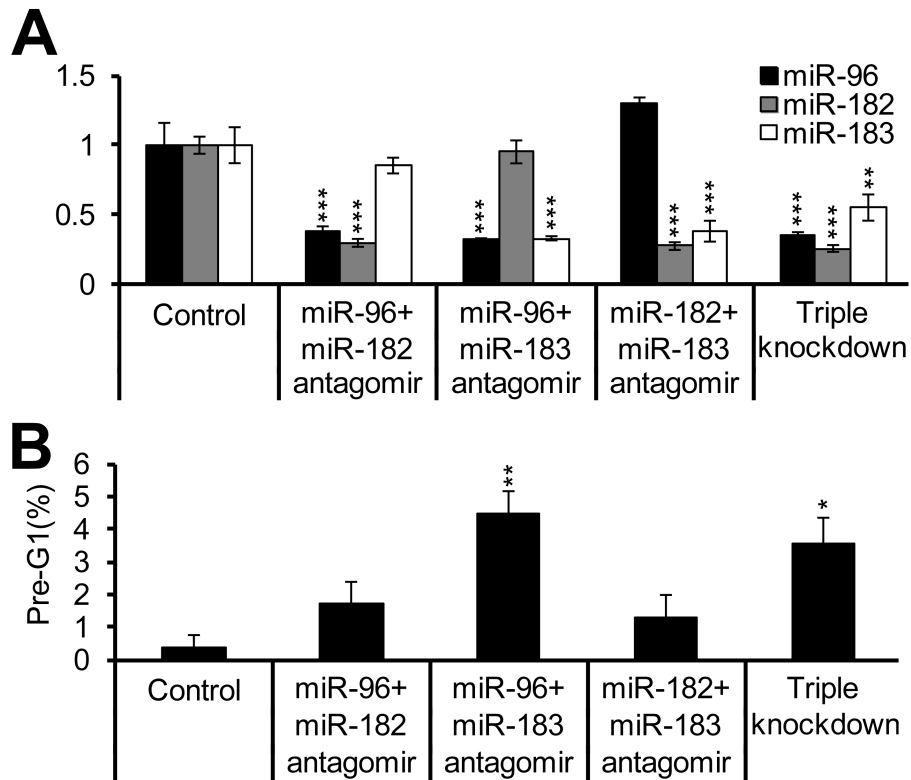

**Figure S5. Inhibition two or three of the cluster members at one time induced apoptosis in T47D cells. (A)** Real time PCR results showed the knockdown efficiency and specificity of miR-Down™ antagonims. **(B)** Flow cytometric analysis showed the pre-G1 cell percentages were increased in cells treated with 2 or 3 antagonims.
