# Supplementary material for: MiR-183/-96/-182 cluster is up-regulated in most breast cancers and increases cell proliferation and migration
Source: Springer Nature journal article supplement (doi:10.1186/s13058-014-0473-z), 2014-11-13
Supplement: MOESM7 [file 9781240]

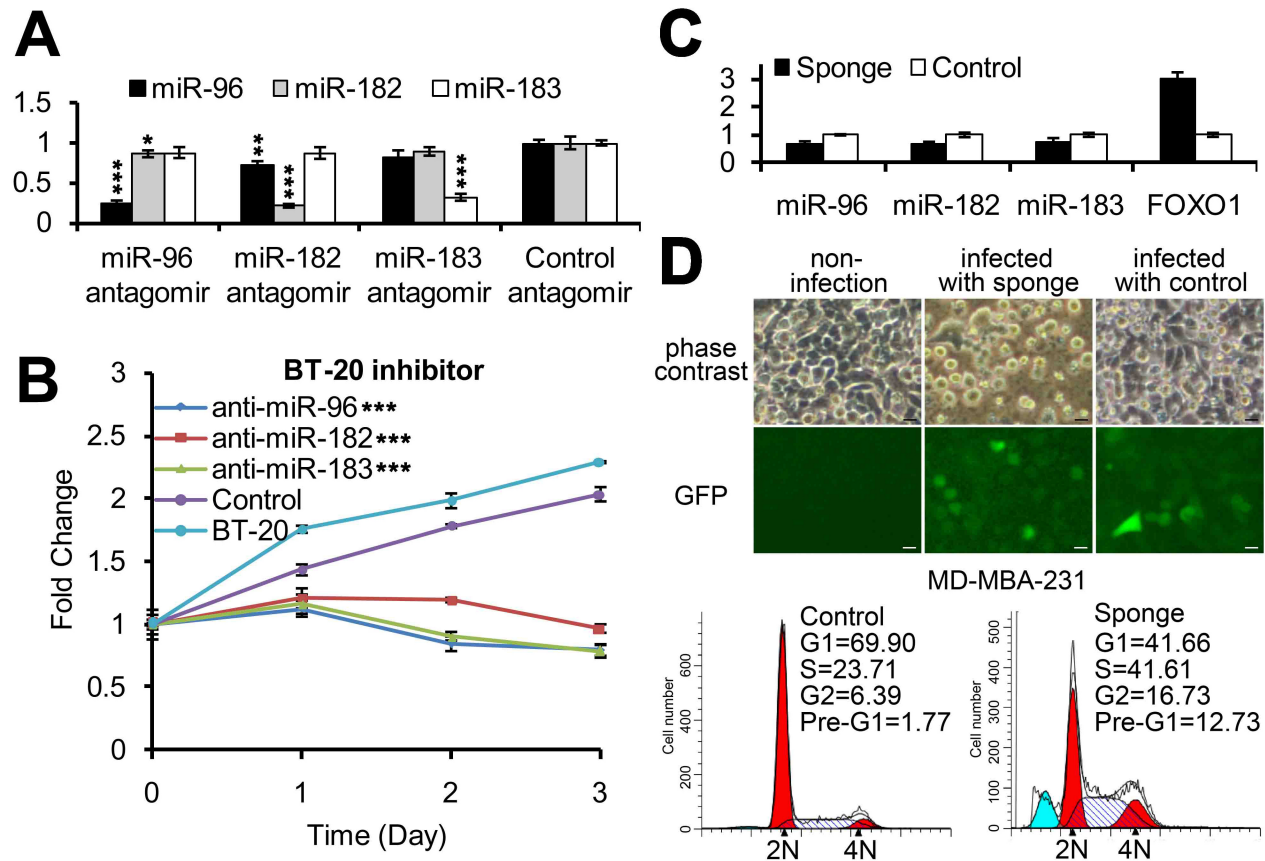

**Figure S4. Test of the miRNA knockdown effects in basal like breast cancer cells. (A)** Real-time PCR results showed the knockdown efficiency and specificity of miR-Down<sup>TM</sup> antagomirs in BT-20 cells. U6 snRNA was used as internal control. Error bars represent standard deviation (n = 4). **(B)** MTT assays showed the cell growth rates of BT-20 cells after knockdown of *miR-183/96/182* cluster. Error bars represent standard deviation (n = 4). **(C)** Test of the inhibition efficiency of *miR-183/96/182* cluster sponge lentivirus by Real-time PCR. Error bars represent standard deviation (n = 3). **(D)** MDA-MB-231 cells infected with *miR-183/96/182* cluster sponge lentivirus underwent apoptosis 3 days after transduction. Scale bars: 20  $\mu$ m. The upper panels showed the phase contrast and green fluorescent micrographs of indicated cells. The bottom panels showed the flow cytometric graph of indicated cells.
